# Supplementary material
Source: Royal Society of Chemistry journal article supplement (doi:10.1039/d6tc00209a)
Supplement: d6tc00209a1.pdf [file d6tc00209a1.pdf]

## Supplementary Information

### Enhanced H<sub>2</sub>S Gas Detection Using Low-Cost Carbon Loaded CuCrO<sub>2</sub>- CuO Nanomaterials

Shaik Ruksana<sup>a</sup>, Seetha Lakshmy<sup>a</sup>, Amit Kumar<sup>b</sup>, Chandra Shekhar Sharma<sup>a,\*</sup>, Mahesh  
Kumar<sup>b,\*</sup>

*<sup>a</sup>Department of Chemical Engineering, Indian Institute of Technology Hyderabad,  
Hyderabad, Telangana, 502285, India*

*<sup>b</sup>Department of Electrical Engineering, Indian Institute of Technology Jodhpur, Jodhpur,  
Rajasthan, 342037, India*

*Corresponding author E-mail: [cssharma@che.iith.ac.in](mailto:cssharma@che.iith.ac.in) (C. S. Sharma), [mkumar@iitj.ac.in](mailto:mkumar@iitj.ac.in)*

*(M. Kumar)*

## Experimental method

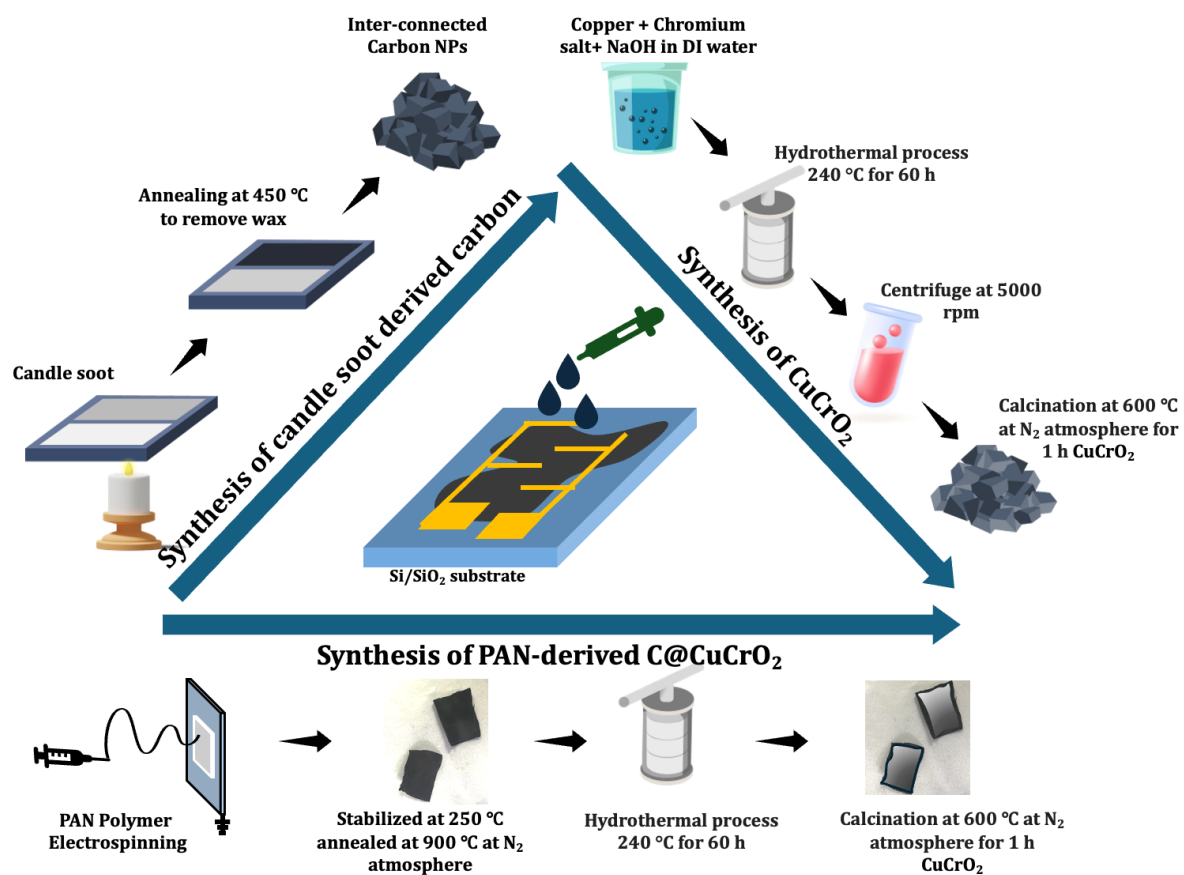

Fig. S1 Synthesis process of C-loaded  $\text{CuCrO}_2$  and sensor fabrication.

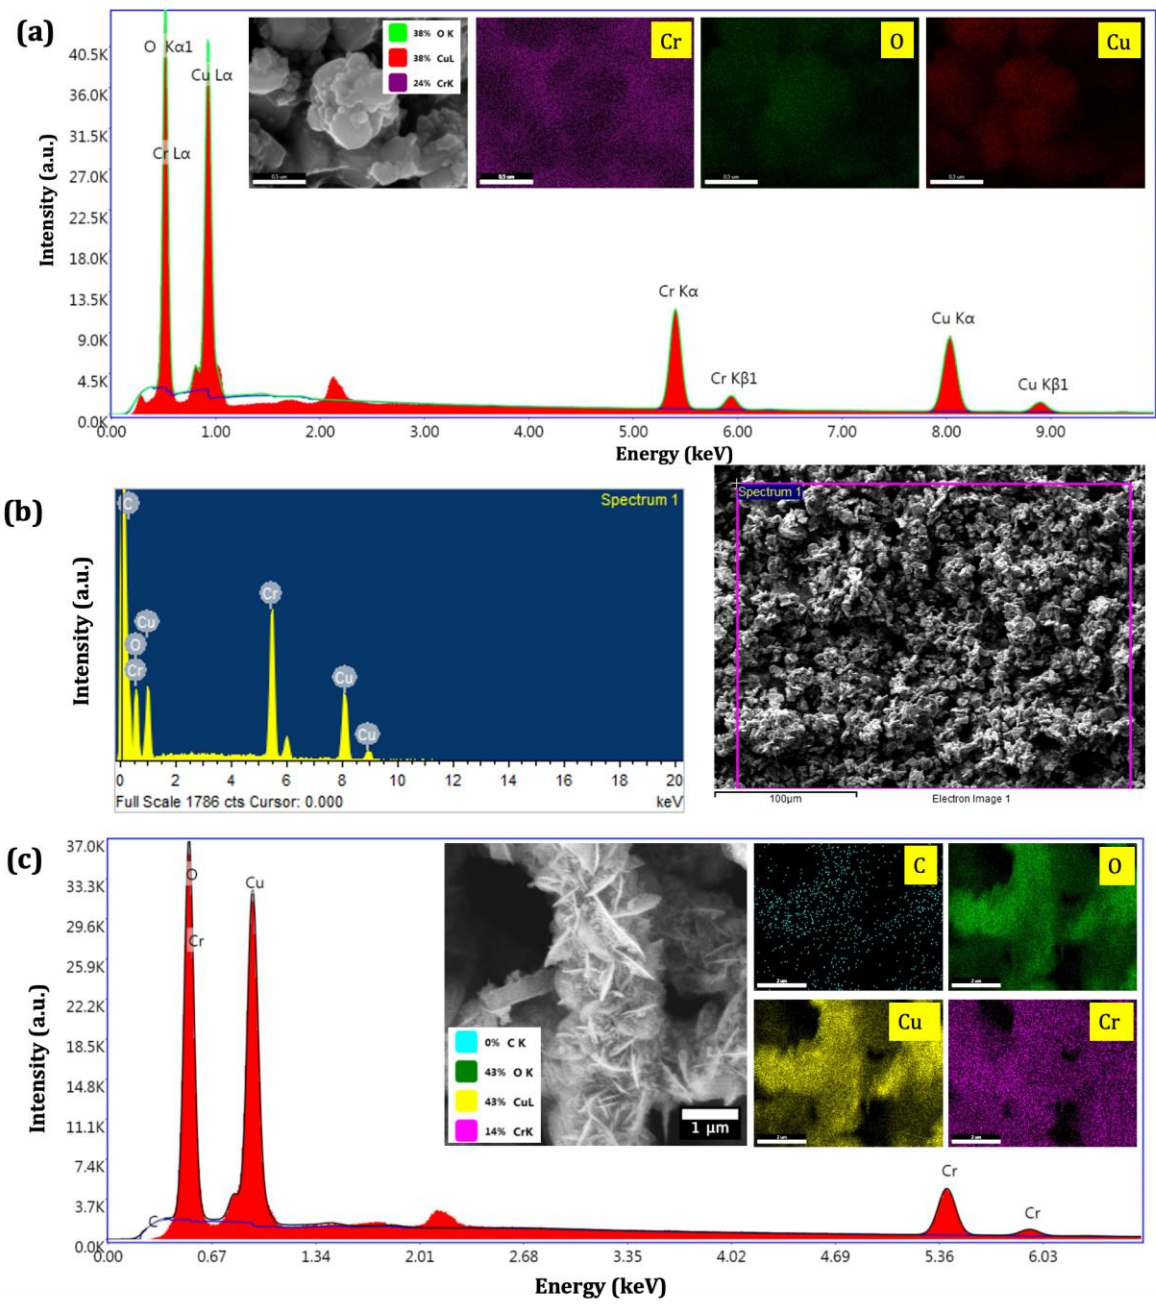

Fig. S2 EDS analysis of (a)  $\text{CuCrO}_2$ ,  $\text{CS@CuCrO}_2$  and (c) PAN-derived  $\text{CNF@CuCrO}_2$ .

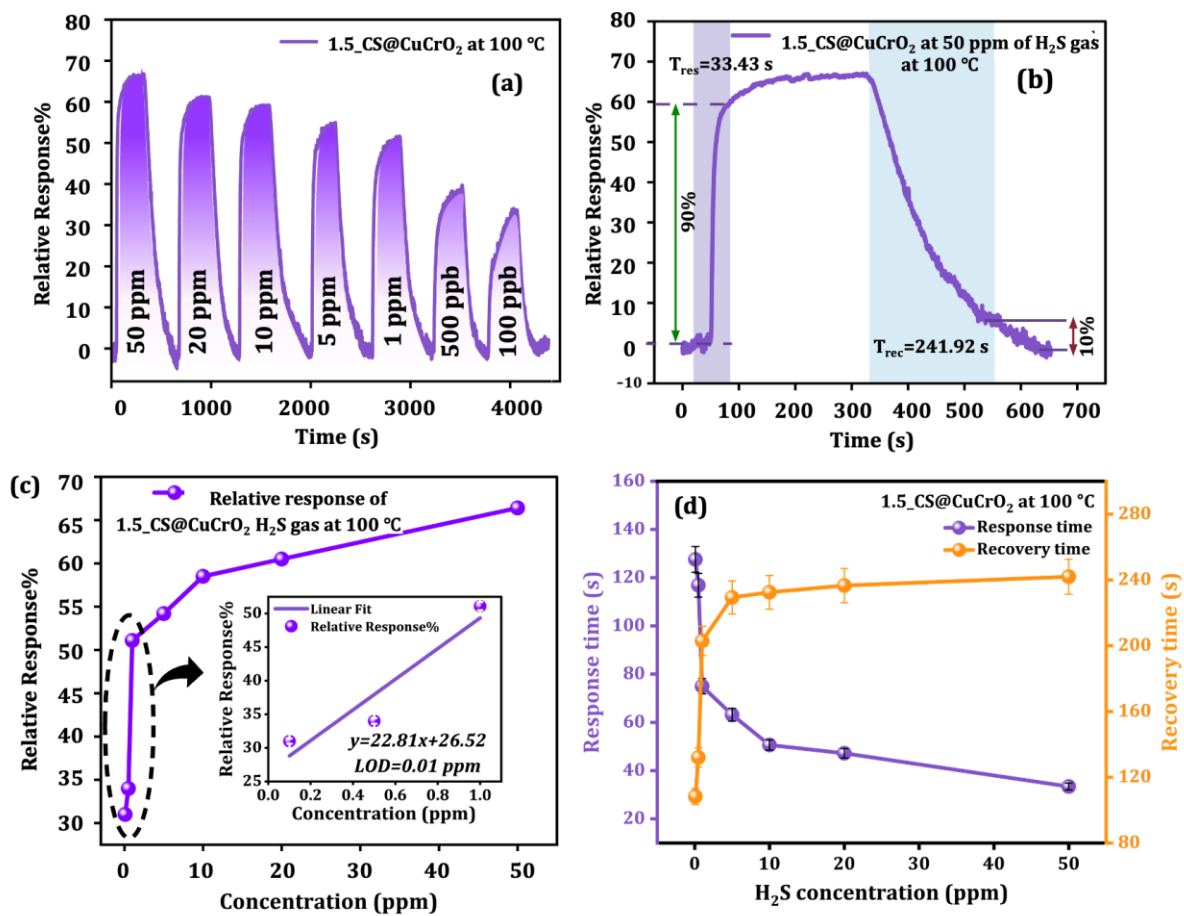

Fig. S3 (a) Response plot of 1.5\_CS@CuCrO<sub>2</sub> at various concentration of H<sub>2</sub>S gas. (b) Response and recovery time of 1.5\_CS@CuCrO<sub>2</sub> at 50 ppm for H<sub>2</sub>S gas at 100 °C. (c) Calculated LOD for 1.5\_CS@CuCrO<sub>2</sub> for H<sub>2</sub>S gas at 100 °C. (d) Response and recovery time of 1.5\_CS@CuCrO<sub>2</sub> for difference concentration of H<sub>2</sub>S gas at 100 °C.

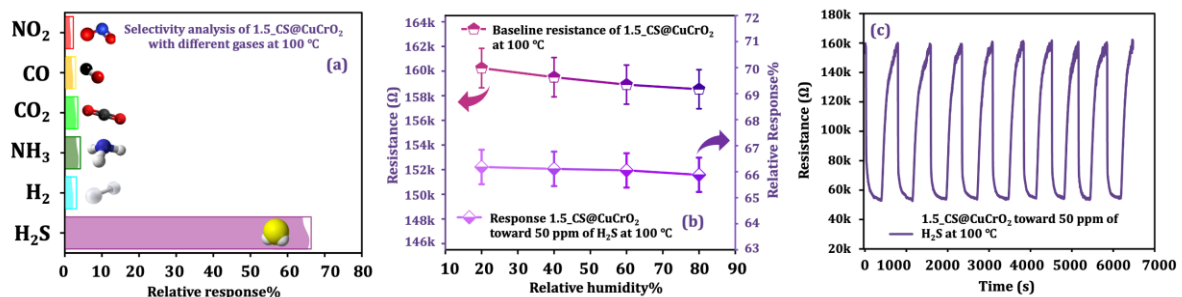

Fig. S4 (a) Selectivity analysis with other gases for CS@CuCrO<sub>2</sub> at 100 °C. (b) Effect of relative humidity ( $\pm 3.5\%$  RH at  $30^\circ\text{C} \pm 4^\circ\text{C}$ ) on the baseline resistance and response of

CS@CuCrO<sub>2</sub> 50 ppm of H<sub>2</sub>S gas at 100 °C. (c) Repeatability for CS@CuCrO<sub>2</sub> for 9 cycles for 50 ppm of H<sub>2</sub>S gas at 100 °C.

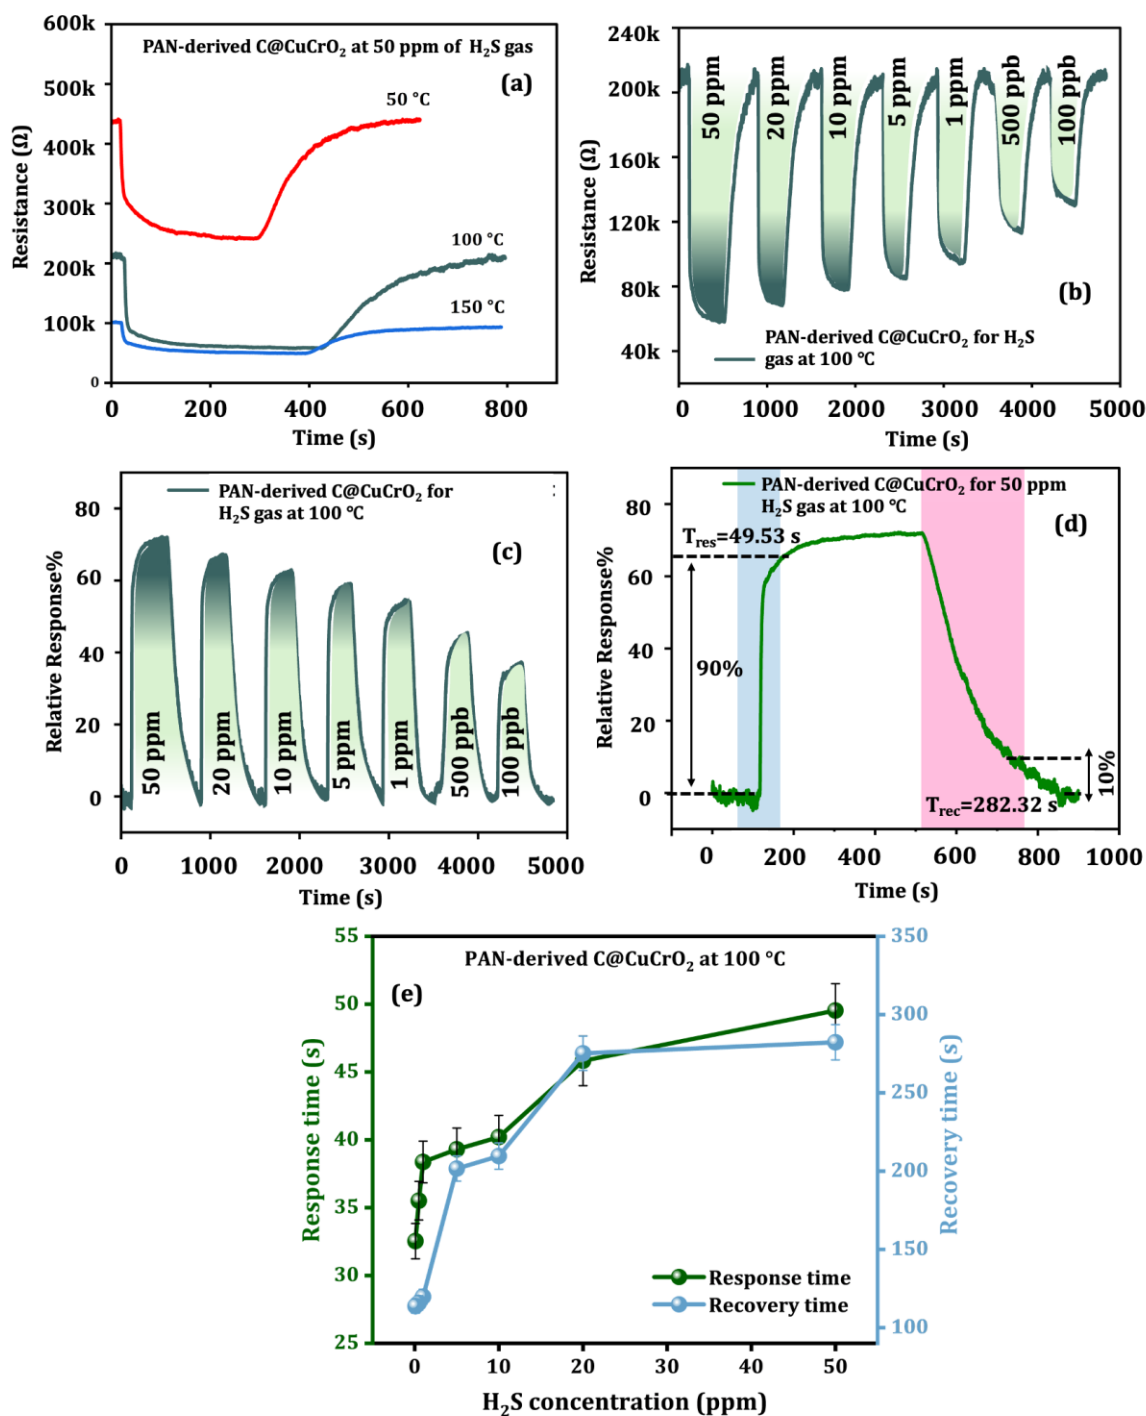

Fig. S5 (a) Resistance changes for 50 ppm of H<sub>2</sub>S gas for PAN-derived C@CuCrO<sub>2</sub> exposed various temperatures. (b) Resistance and gas sensing response plot of PAN-derived C@CuCrO<sub>2</sub> at different concentrations of H<sub>2</sub>S gas at 100 °C. (c) Calculated response for PAN-derived

C@CuCrO<sub>2</sub> to varying concentrations of H<sub>2</sub>S gas at 100 °C. (d) Response and recovery time of PAN-derived C@CuCrO<sub>2</sub> at 50 ppm for H<sub>2</sub>S gas at 100 °C. (e) Response and recovery time of PAN-derived C@CuCrO<sub>2</sub> for various concentration of H<sub>2</sub>S gas at 100 °C.

To know the optimum temperature, PAN-derived C@CuCrO<sub>2</sub> was exposed to 50 ppm of H<sub>2</sub>S gas at different temperatures. Fig. S5a indicates the sensor's performance was adequate at 100 °C for 50 ppm of H<sub>2</sub>S gas, following all the studies at 100 °C. Fig. S5b represents the behavior of the PAN-derived C@CuCrO<sub>2</sub>, which was tested against H<sub>2</sub>S gas varying the concentration from 50 ppm to 100 ppb. The calculated response based on resistance change indicates a 70.98% response for 50 ppm of H<sub>2</sub>S gas, comparatively higher than the CS@CuCrO<sub>2</sub> (Fig. S5c). At 500 and 100 ppb of H<sub>2</sub>S gas, the sensor responded effectively with 49% and 40%, respectively. The consistency at lower concentrations confirms the sensitivity to H<sub>2</sub>S gas. The enhanced performance is attributed to the modified surface area and uniform growth of CuCrO<sub>2</sub> petals on PAN-derived carbon nanofibers, which offers a more active site for the adsorption of H<sub>2</sub>S gas<sup>1-3</sup>. To analyze the response time and recovery time, 50 ppm of H<sub>2</sub>S gas was evaluated further to attain 49 s and 282.2 s of response and recovery time, respectively (Fig. S5d). The response and recovery time for various concentration of H<sub>2</sub>S is calculated (Fig. S5e), the data interprets as the concentration of H<sub>2</sub>S is increased, the sensor is taking more time to sense the gas. The prolonged response and recovery times for PAN-derived C@CuCrO<sub>2</sub> can be attributed to the modified structure of the C@CuCrO<sub>2</sub>, as represented in the FESEM analysis, the uniform growth of the CuCrO<sub>2</sub> on the PAN-derived CNF.

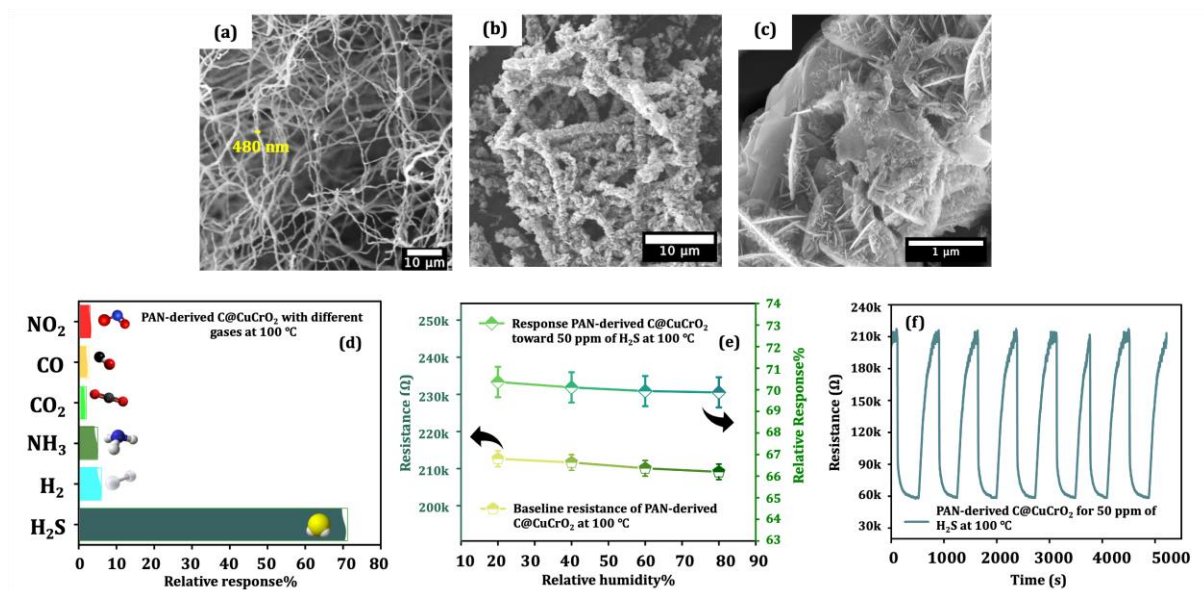

Fig. S6 FESEM micrographs of (a) PAN-derived CNF and (b & c) CuCrO<sub>2</sub> grown on PAN-derived CNF. (d) Selectivity analysis with other gases for PAN-derived C@CuCrO<sub>2</sub> at 100 °C. (e) Effect of relative humidity ( $\pm 3.5\%$  RH at  $30^\circ\text{C} \pm 4^\circ\text{C}$ ) on the baseline resistance and response of PAN-derived C@CuCrO<sub>2</sub> for 50 ppm of H<sub>2</sub>S gas at 100 °C. (f) Repeatability for PAN-derived C@CuCrO<sub>2</sub> for 7 cycles for 50 ppm of H<sub>2</sub>S gas at 100 °C.

Fig. S6a shrinkage in the CNF nanofiber is due to the exposure to elevated temperature and conversion of polymer to carbon at 900 °C in the N<sub>2</sub> atmosphere. The average diameter of PAN-derived CNF was reported as ~480 nm. The *in-situ* growth of CuCrO<sub>2</sub> on CNF can be seen in Fig. S6b and S6c. These CuCrO<sub>2</sub> grown petals on PAN-derived CNF result in surface roughness, enhancing the active gas adsorption sites.

Table 1. Comparison of carbon based CuCrO<sub>2</sub> gas sensor with literature.

| S. No. | Material utilized                                          | Gas              | Operating Temp. °C | Response %         | Response time (s) | Recovery time (s) | Ref.         |
|--------|------------------------------------------------------------|------------------|--------------------|--------------------|-------------------|-------------------|--------------|
| 1      | CuCrO <sub>2</sub> nanoparticles                           | H <sub>2</sub> S | 100 °C             | ~40%<br>(50 ppm)   | 30                | 60                | 4            |
| 2      | CuGaO <sub>2</sub> thin film                               | H <sub>2</sub> S | 100 °C             | ~25%<br>(50 ppm)   | 66                | 258               | 5            |
| 3      | PAN/Nickel Nanofiber on QCM                                | Methanol         | RT                 | 389+3.8 Hz/SCCM    | 288               | 251               | 6            |
| 4      | PANI/N-GQD/Hollow In <sub>2</sub> O <sub>3</sub> nanofiber | NH <sub>3</sub>  | RT                 | 15.2%<br>(1 ppm)   | -                 | -                 | 7            |
| 5      | 1.5_CS@CuCrO <sub>2</sub>                                  | H <sub>2</sub> S | 100 °C             | 66.4%<br>(50 ppm)  | 82.78             | 221.79            | Present work |
| 6      | PAN-derived C@CuCrO <sub>2</sub>                           | H <sub>2</sub> S | 100 °C             | 70.49%<br>(50 ppm) | 97.81             | 949.2             | Present work |

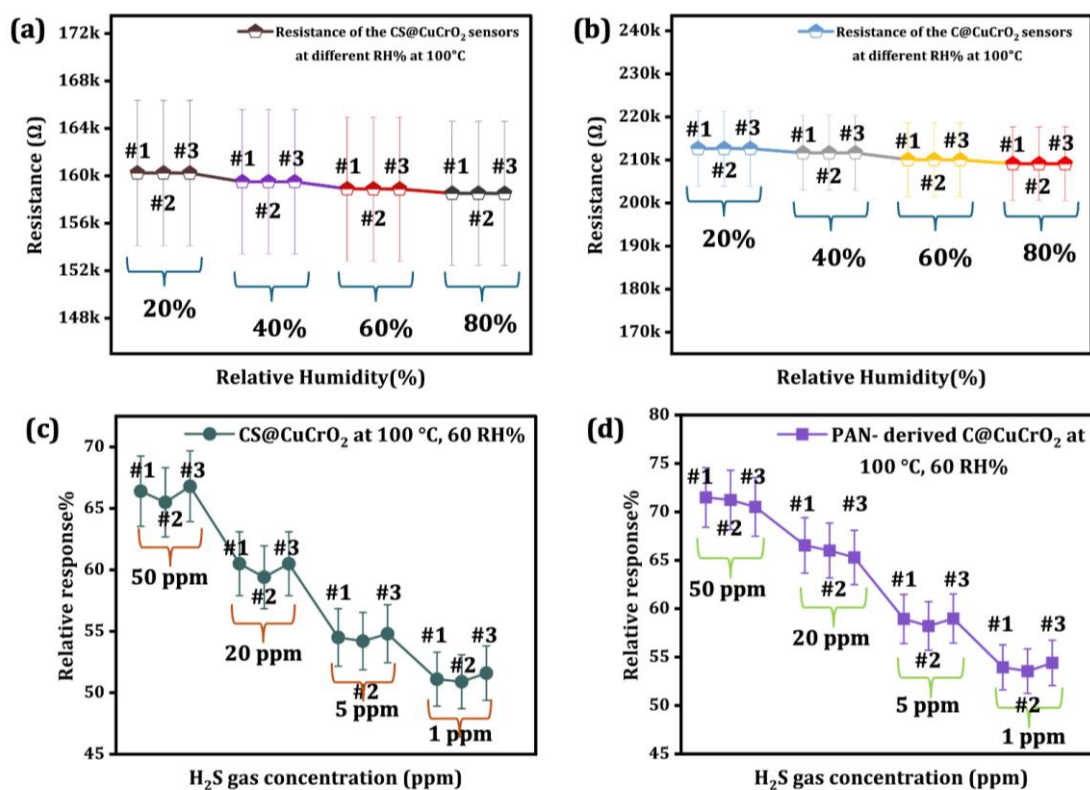

Fig. S7 Monitoring baseline resistance for various samples of (a) CS@CuCrO<sub>2</sub> and (b) PAN-derived C@CuCrO<sub>2</sub> operated at various humid conditions at 100 °C. Relative response of 3 samples of (c) CS@CuCrO<sub>2</sub> and (d) PAN-derived C@CuCrO<sub>2</sub> kept at 60% RH for different concentration of H<sub>2</sub>S gas.

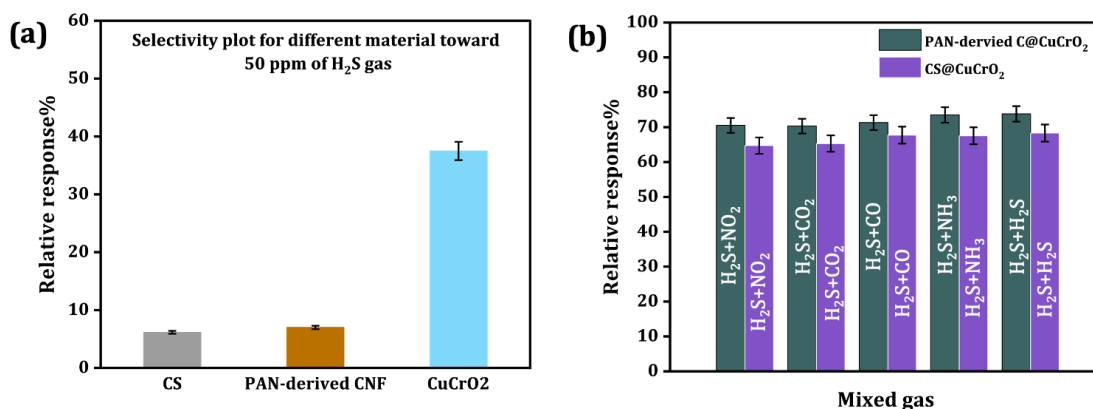

Fig. S8 Selectivity plot for (a) different materials toward 50 ppm of H<sub>2</sub>S gas. (b) Selectivity plot both sensors CS@CuCrO<sub>2</sub> and PAN-derived C@CuCrO<sub>2</sub> with mixed gases.

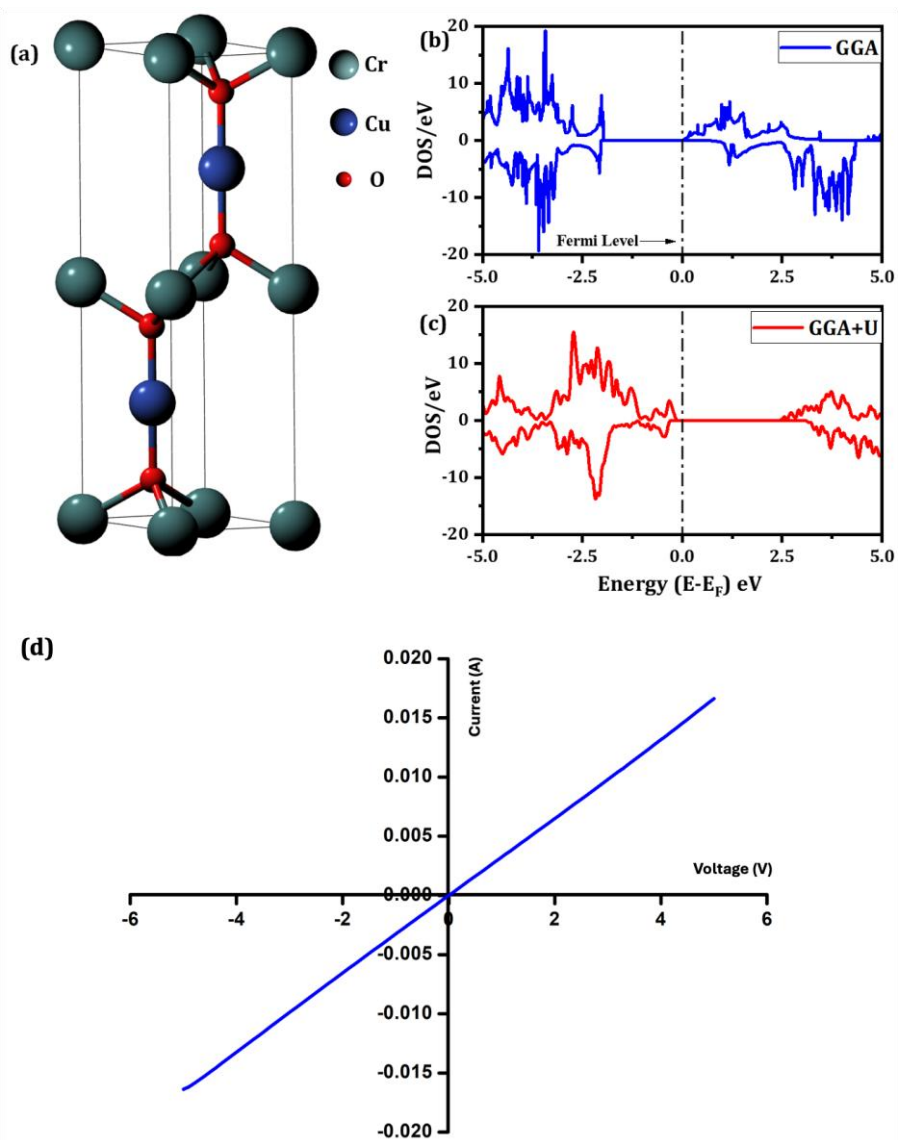

Fig. S9 (a) DFT-optimized unit cell of bulk  $\text{CuCrO}_2$  and DOS plots of bulk  $\text{CuCrO}_2$  calculated using (b) GGA and (c) GGA+U hybrid functional. (d) IV characteristics of candle soot.

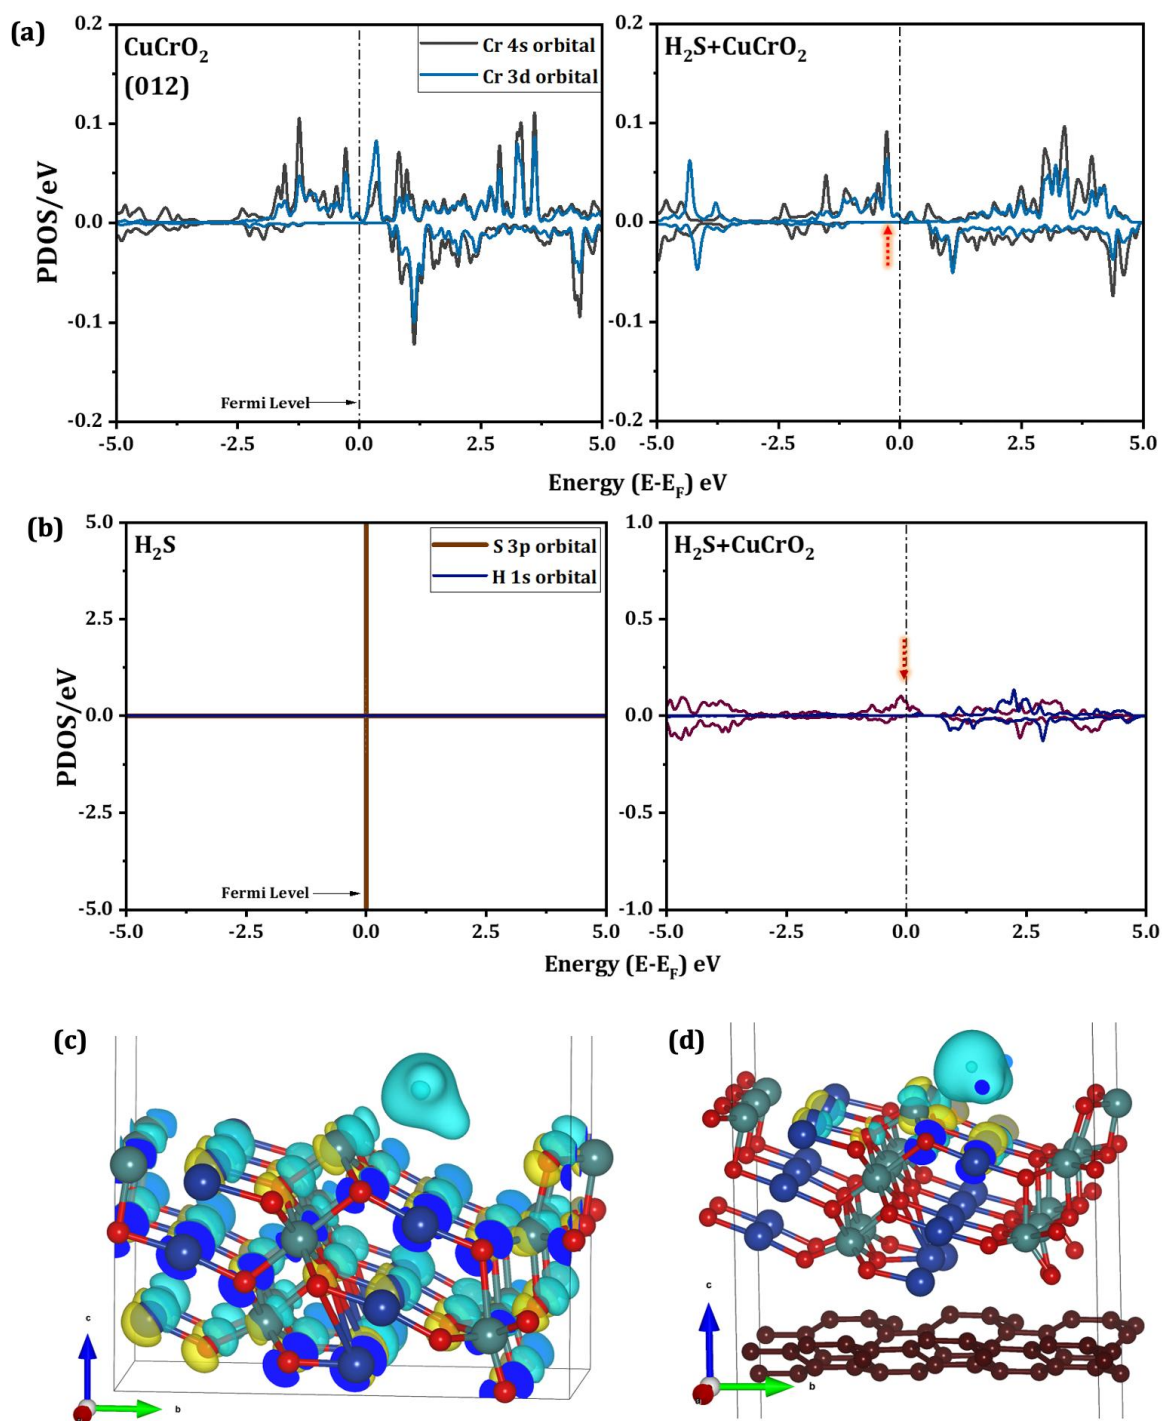

Fig. S10 PDOS plots comparing the valence orbitals of (a) Cu and Cr of CuCrO<sub>2</sub> before (left panel) and after (right panel) H<sub>2</sub>S interaction (b) H atom of H<sub>2</sub>S in the isolated state (left) and after interaction (right) with the CuCrO<sub>2</sub>. Charge density difference iso-surface plot of H<sub>2</sub>S adsorbed (c) CuCrO<sub>2</sub> and (d) CuCrO<sub>2</sub>@C with the iso-surface value of 0.06 and 0.03 e Å<sup>-3</sup>,

respectively. The cyan color around the H<sub>2</sub>S indicates the charge loss while the yellow color around the Cr atom indicates charge gain.

### References:

- (1) S. Hou, R. Pang, S. Chang, L. Ye, J. Xu, X. Wang, Y. Zhang, Y. Shang, A. Cao, Synergistic CNFs/CoS<sub>2</sub>/MoS<sub>2</sub> Flexible Films with Unprecedented Selectivity for NO Gas at Room Temperature, *ACS Appl Mater Interfaces* 12 (2020) 29778–29786. <https://doi.org/10.1021/acsami.0c05953>
- (2) Q. Duan, W. Zhang, L. Li, B. Ying, T. Li, B. Chen, H.Y. Li, H. Liu, W-CeO<sub>2</sub> nanospheres gas sensor array for accurate and selective H<sub>2</sub>S detection in exhaled breath, *Chem Eng J* 479 (2024) 147748. <https://doi.org/10.1016/j.cej.2023.147748>
- (3) A.N. Begi, S. Hussain, J.N.O. Amu-Darko, S. Shah, W. Junhao, X. Zhang, K. Yusuf, R.K. Manavalan, G. Qiao, G. Liu, Low-concentration H<sub>2</sub>S gas sensors based on MOF-derived Co<sub>3</sub>O<sub>4</sub> nanomaterials, *Sens Actuators A Phys* 378 (2024) 115776. <https://doi.org/10.1016/j.sna.2024.115776>
- (4) R. Zhang, Z. Deng, L. Shi, M. Kumar, J. Chang, S. Wang, X. Fang, W. Tong, G. Meng, Pt-Anchored CuCrO<sub>2</sub> for Low-Temperature-Operating High-Performance H<sub>2</sub>S Chemiresistors, *ACS Appl Mater Interfaces* 14 (2022) 24536–24545. <https://doi.org/10.1021/acsami.2c00619>
- (5) A. Kumar, S. Barala, M.M. Ganaie, M. Kumar, Delafossite CuGaO<sub>2</sub> nanomaterial-based room temperature H<sub>2</sub>S selective gas sensor, *J Mater Chem C Mater* 12 (2024) 16854–16863. <https://doi.org/10.1039/d4tc02872d>
- (6) Y.M. Rohman, R. Sukowati, A. Priyanto, D.A. Hapidin, D. Edikresnha, K. Khairurrijal, Quartz Crystal Microbalance Coated with Polyacrylonitrile/Nickel Nanofibers for High-Performance Methanol Gas Detection, *ACS Omega* 8 (2023) 13342–13351. <https://doi.org/10.1021/acsomega.3c00760>

(7) N. Indarit, Y.H. Kim, N. Petchsang, R. Jaisutti, Highly sensitive polyaniline-coated fiber gas sensors for real-time monitoring of ammonia gas, *RSC Adv* 9 (2019) 26773–26779. <https://doi.org/10.1039/c9ra04005f>
